# Supplementary material
Source: PubMed Central journal article supplement (PMC8420216)
Supplement: IJPO-17-0-s001.pdf [file IJPO-17-0-s001.pdf]

**Title:** Impact of the COVID-19 pandemic on elementary schoolers' physical activity, sleep, screen time, and diet: A quasi-experimental interrupted time series study

**Authors:** Sarah Burkart<sup>a</sup>, PhD, Hannah Parker<sup>a</sup>, MS, R. Glenn Weaver<sup>a</sup>, PhD, Michael W. Beets<sup>a</sup>, PhD, Alexis Jones<sup>a</sup>, MS, Elizabeth L. Adams<sup>b</sup>, PhD, Jean-Philippe Chaput<sup>c</sup>, PhD & Bridget Armstrong<sup>a</sup>, PhD

**Affiliations:** <sup>a</sup>University of South Carolina, Columbia, SC, USA

<sup>b</sup>Virginia Commonwealth University, Richmond, VA, USA

<sup>c</sup>Healthy Active Living and Obesity Research Group, Children's Hospital of Eastern Ontario Research Institute, Ottawa, ON, Canada

Table S1. Number of children with valid measures by year.

|                    | 2018 | 2019 | 2020 |
|--------------------|------|------|------|
| <b>Sample Size</b> |      |      |      |
| n=102              | X    |      |      |
| n=22               |      | X    |      |
| n=33               | X    | X    |      |
| n=2                | X    |      | X    |
| n=26               |      | X    | X    |
| n=46               | X    | X    | X    |

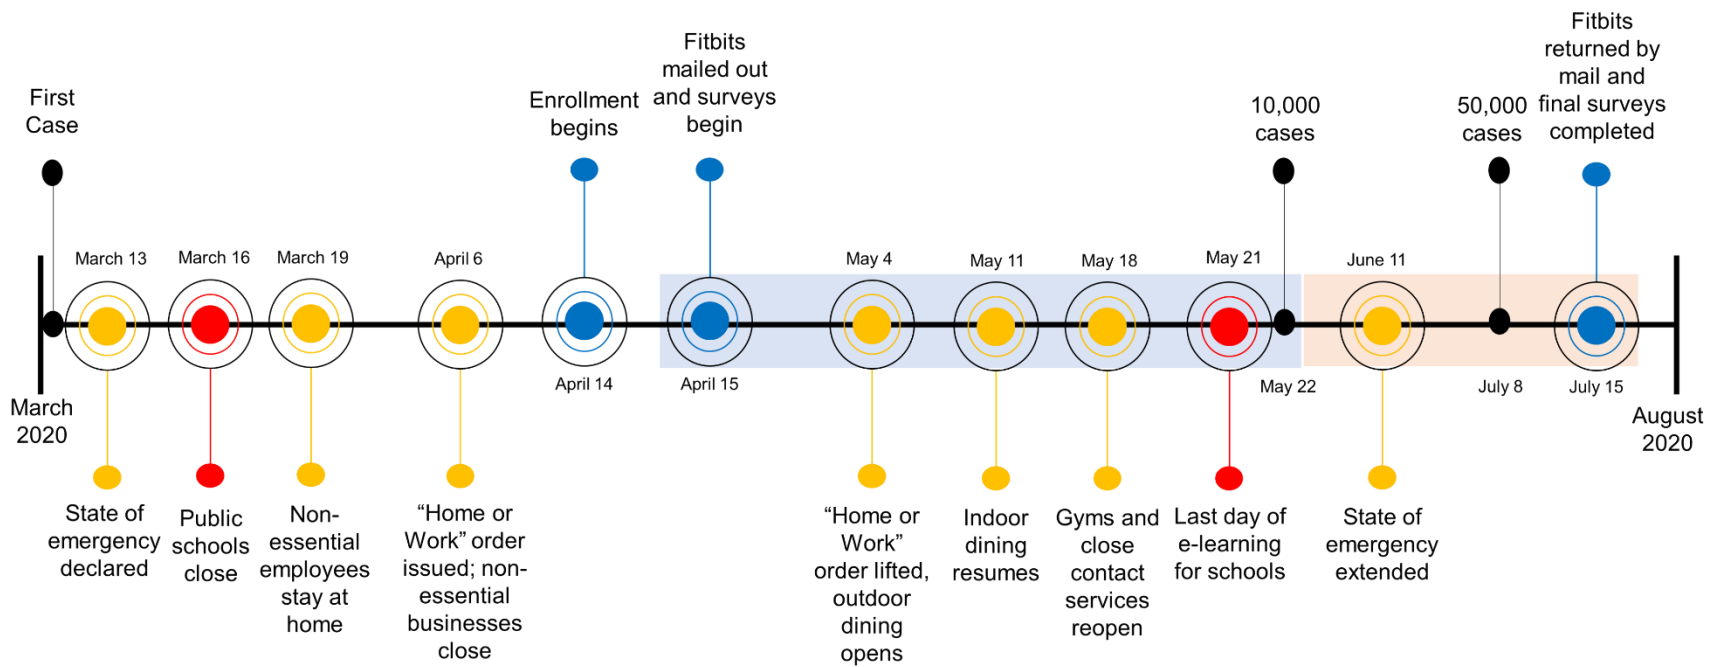

Figure S1. Overlapping timeline of study-related events and South Carolina's COVID-19 response.

Spring Data Collection Summer Data Collection
